# Supplementary material for: Potential Anti-Alzheimer Agents from Guanidinyl Tryptophan Derivatives with Activities of Membrane Adhesion and Conformational Transition Inhibitions
Source: MDPI journal article supplement (doi:10.3390/molecules26164863), 2021-08-11
Supplement: s1 [file s1]

**Potential Anti-Alzheimer Agents From GuanidinyI Tryptophan Derivatives with Activities of Membrane Adhesion and Conformational Transition Inhibitions**

**Supplementary Materials**

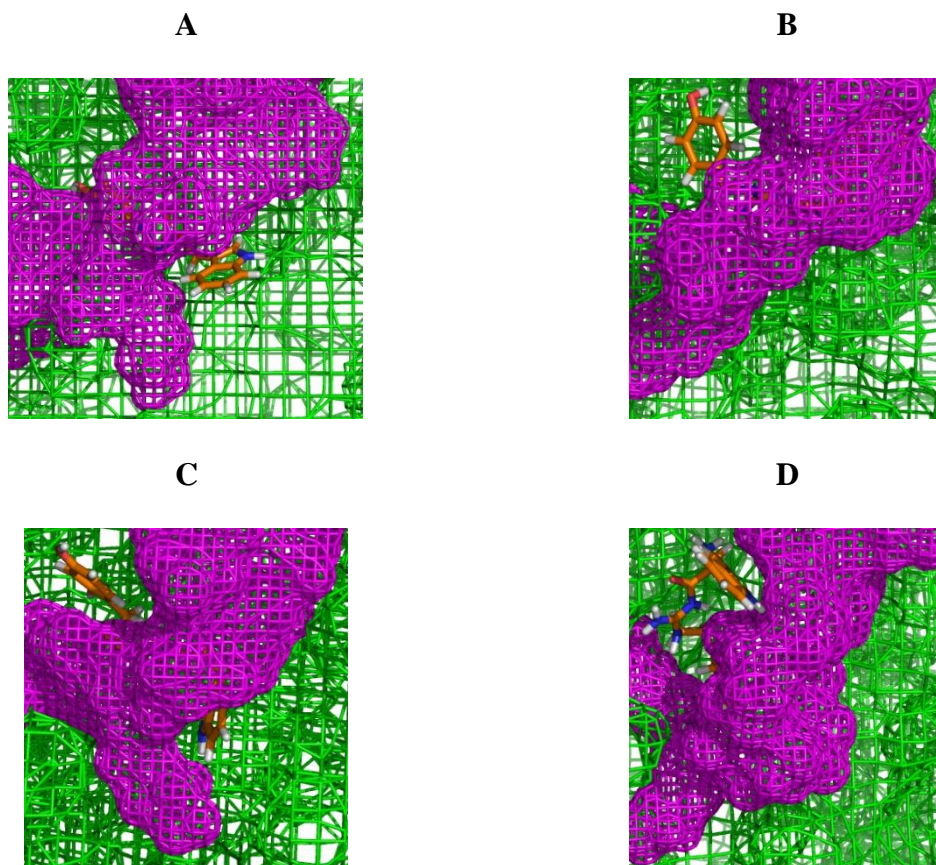

**Figure S1.** Closed views of the complexes of Aβ<sub>1-42</sub> monomers and (A) TGN1, (B) TGN2, (C) TGN3, and (D) TGN4 on the upper-layer surfaces of the POPC membranes. The Aβ<sub>1-42</sub> monomers, ligands, and POPC membranes are shown in magenta-mesh, orange-stick, and green-mesh representations, respectively.

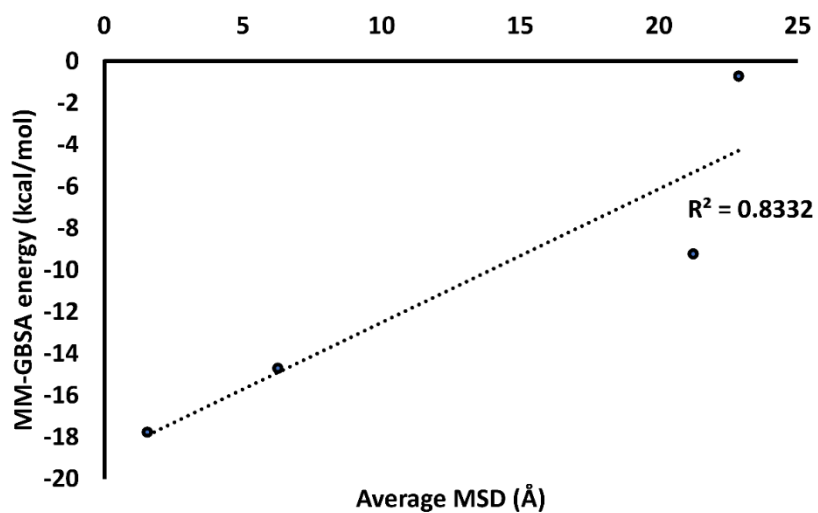

**Figure S2.** Correlation between the MM-GBSA scores and the MSD values of TGN1, TGN2, TGN3, and TGN4.

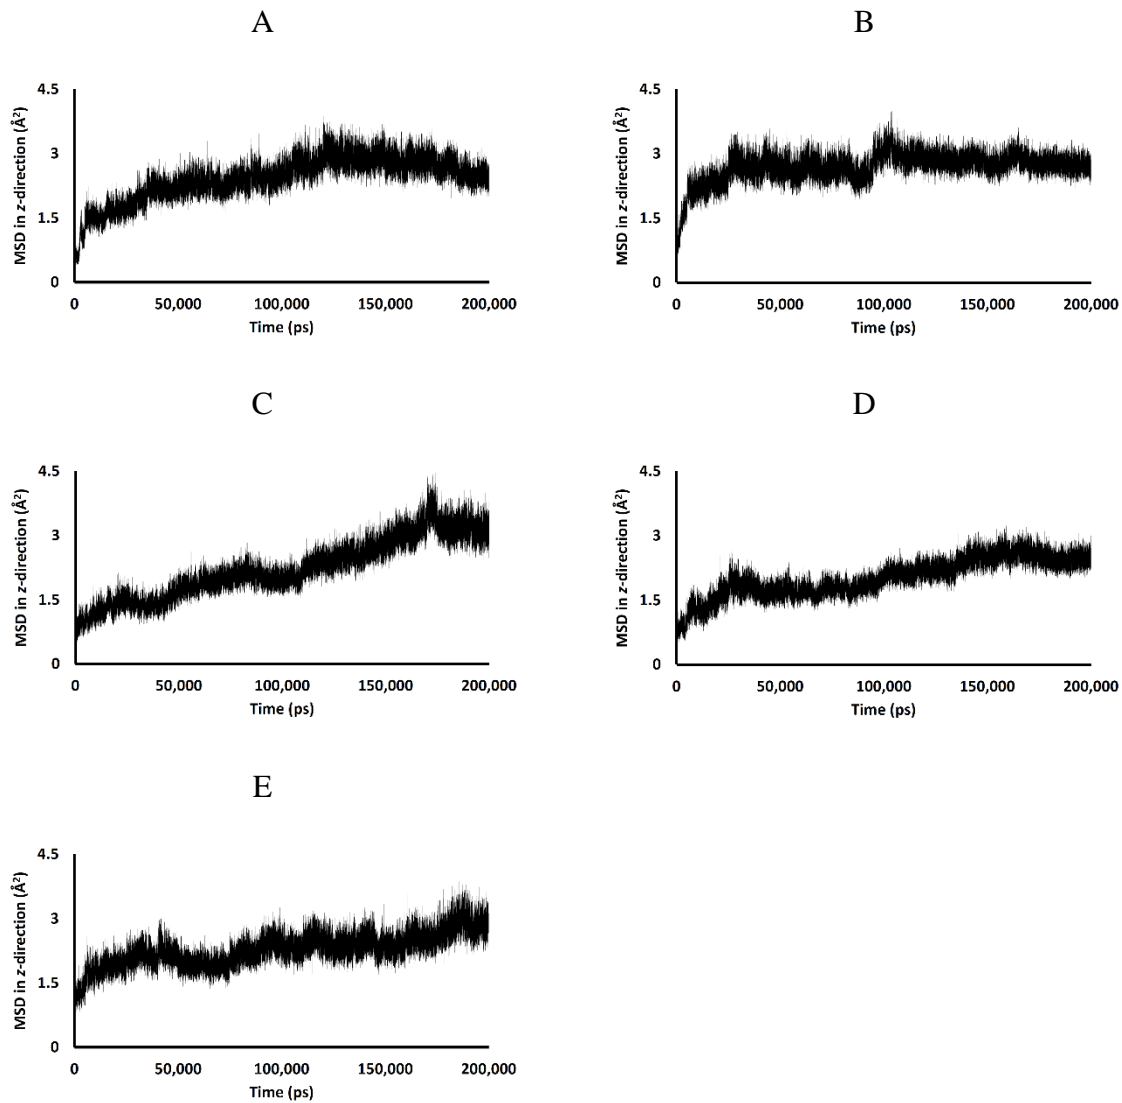

**Figure S3.** The mobilities in the z-direction of the A $\beta_{1-42}$  monomer structures in (A) TGN1, (B) TGN2, (C) TGN3, (D) TGN4, and (E) no ligand (only monomer) models in the POPC membranes are shown as MSD on the ps timescale.
